# Supplementary material for: Rational design of hierarchical CuO/Cu2O/SnO2 branched supernanowires for highly sensitive non-enzymatic glucose sensors
Source: Royal Society of Chemistry journal article supplement (doi:10.1039/d5nr02827b), 2025-01-01
Supplement: d5nr02827b1.pdf [file d5nr02827b1.pdf]

## Supplementary Information

### **Rational design of hierarchical CuO/Cu<sub>2</sub>O/SnO<sub>2</sub> branched supernanowires for high-sensitive non-enzymatic glucose sensors**

Peng Luo<sup>a</sup>, Qing-Qing Zhou<sup>a</sup>, Ying-Li Shi<sup>c</sup>, Yang-Biao Xue<sup>b</sup>, Zuo-Shan Wang<sup>a\*</sup>, Min Zheng<sup>b\*</sup>, Ming-Peng Zhuo<sup>b\*</sup>

<sup>a</sup> College of Chemistry, Chemical Engineering and Materials Science, Soochow University, Suzhou, Jiangsu 215123, China.

<sup>b</sup> National Engineering Laboratory for Modern Silk, College of Textile and Clothing Engineering, Soochow University, Suzhou Jiangsu 215123, China.

<sup>c</sup> Department of Electrical and Electronic Engineering, School of Advanced Technology, Xi'an Jiaotong-Liverpool University, Suzhou, Jiangsu 215123, China.

Correspondence and requests for materials should be addressed to Z.-S. Wang (zuoshanwang@suda.edu.cn), M.-P. Zhuo (mpzhuo@suda.edu.cn), and M. Zheng (zhengmin@suda.edu.cn).

## **Experimental details**

### **1. Materials**

Cupric acetate monohydrate ( $\text{Cu}(\text{Ac})_2 \cdot \text{H}_2\text{O}$ ), polyethylene glycol 200 (PEG200), sodium hydroxide (NaOH), Stannic chloride pentahydrate ( $\text{SnCl}_4 \cdot 5\text{H}_2\text{O}$ ) were purchased from Sinopharm Chemical Reagent Co., Ltd. All the reagents used here were analytically pure except for PEG200 which was of chemical grade. They were used directly without any further purification, and deionized water was used throughout the experimental procedure.

### **2. Synthesis of porous $\text{Cu}(\text{OH})_2$ nanorods**

$\text{Cu}(\text{OH})_2$  nanorods were fabricated by a simple precipitation method. The preparation process is as follows: Configure the same volumes of  $0.3 \text{ mol L}^{-1}$   $\text{Cu}(\text{Ac})_2$  and  $3 \text{ mol L}^{-1}$  NaOH aqueous solutions, respectively, and stir for a few minutes. Then  $\text{Cu}(\text{Ac})_2$  solution was added dropwise to NaOH solution under rapid magnetic stirring. At the end of the reaction, the reaction was immediately centrifuged and washed with deionized water and ethanol, and dried at  $60^\circ\text{C}$  for 12 h.

### **3. Synthesis of barnyardgrass-like $\text{CuO}/\text{Cu}_2\text{O}/\text{SnO}_2$ (B- $\text{CuO}/\text{Cu}_2\text{O}/\text{SnO}_2$ ) nanowires and $\text{CuO}/\text{Cu}_2\text{O}/\text{SnO}_2$ nanorods**

B- $\text{CuO}/\text{Cu}_2\text{O}/\text{SnO}_2$  nanowires and  $\text{CuO}/\text{Cu}_2\text{O}/\text{SnO}_2$  nanorods nanowires were synthesized by a microwave method. The entire experimental procedure is as follows: Firstly, 24 mg of porous  $\text{Cu}(\text{OH})_2$  nanorod powder was weighed and added to 100

mLPEG200 and ultrasonically dispersed into a homogeneous solution. Then 0.5 mL of 5 mM NaOH solution and 800  $\mu$ L of 5 mM SnCl<sub>4</sub> solution were added successively. After stirring uniformly, transfer the solution to a 250 mL three-necked flask for microwave reaction with reaction conditions set to 700 W, 180 °C, and obtain a dark green solution after 10 min. Finally, the solution was centrifuged, washed, and dried at 60 °C for 6 h to obtain a dark green powder. Notably, the products synthesized by this method are B-CuO/Cu<sub>2</sub>O/SnO<sub>2</sub> nanowires, and when NaOH is added in smaller amounts or not, the products are CuO/Cu<sub>2</sub>O/SnO<sub>2</sub> nanorods.

#### **4. Preparation of electrodes**

##### **4.1 Pretreatment of glassy carbon electrode**

Before the modification, the surface of the glassy carbon electrode ( $\Phi=3$  mm) was polished to a mirror surface with Al<sub>2</sub>O<sub>3</sub> powders of 1.0  $\mu$ m, 0.3  $\mu$ m and 0.05  $\mu$ m in turn, and then ultrasonically cleaned in anhydrous ethanol and distilled water in turn. Electrochemical pretreatment of electrode: The glassy carbon electrode was placed in 1.0 M H<sub>2</sub>SO<sub>4</sub> solution, and cyclic voltammetric scanning was performed at a sweep rate of 100 mV s<sup>-1</sup> and a voltage sweep range of -1.0 V to +1.0 V until stability.

##### **4.2 Preparation of B-CuO/Cu<sub>2</sub>O/SnO<sub>2</sub> nanowires and CuO/Cu<sub>2</sub>O/SnO<sub>2</sub> nanorods modified electrodes**

1 mg of B-CuO/Cu<sub>2</sub>O/SnO<sub>2</sub> nanowire powder was weighed and dispersed in 2 mL of distilled water and sonicated, followed by pipetting 30  $\mu$ L drops onto the surface of the pretreated glassy carbon electrode, which was dried naturally at room temperature.

Before each test, the surface of the modified electrode is rinsed with secondary water to wash away the impurities on the surface. And the CuO/Cu<sub>2</sub>O/SnO<sub>2</sub> nanorods modified electrodes were prepared by repeated methods.

## 5. Characterization

The samples were observed morphologically using transmission electron microscopy (TEM, FEI Tecnai G20), high resolution transmission electron microscopy (HRTEM, HitachiH600A-G) and selected area electron diffractogram (SAED) to confirm the morphology and crystalline surface of the samples. The crystalline phase of the synthesized samples was ascertained through powder X-ray diffraction (XRD) on a Rigaku D/max-III C X-ray diffractometer with Cu-K $\alpha$  radiation ( $\lambda = 0.154$  nm), scanning from 10° to 80° with a scanning voltage of 40 kV, a scanning current of 100 mA. The elemental composition and valence states were confirmed by x-ray photoelectron spectrometry (XPS, ESCALAB 250). The specific surface area and pore size distribution were analyzed by the Brunauer-Emmett-Teller (BET) method. Electrochemical experiments were performed on CHI-6611D electrochemical workstation with a three-electrode system, which includes working electrode, counter electrode (platinum wire) and reference electrode (saturated chromium alloy electrode).

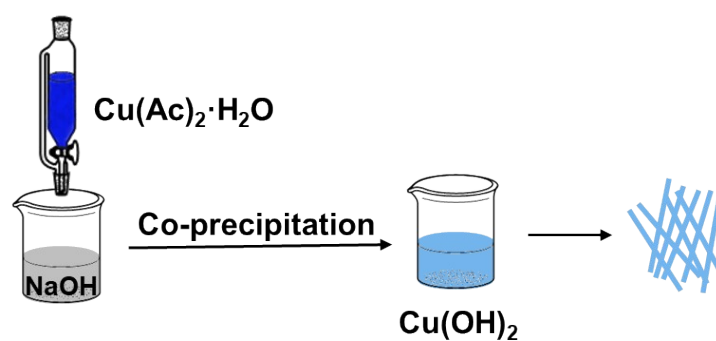

**Fig. S1.** The flow chart of the preparation of porous  $\text{Cu}(\text{OH})_2$  nanorods.

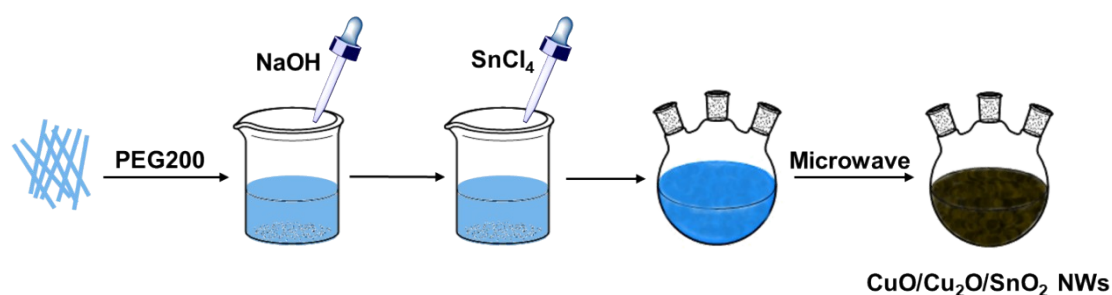

**Fig. S2.** The flow chart of the preparation of B-CuO/Cu<sub>2</sub>O/SnO<sub>2</sub> nanowires.

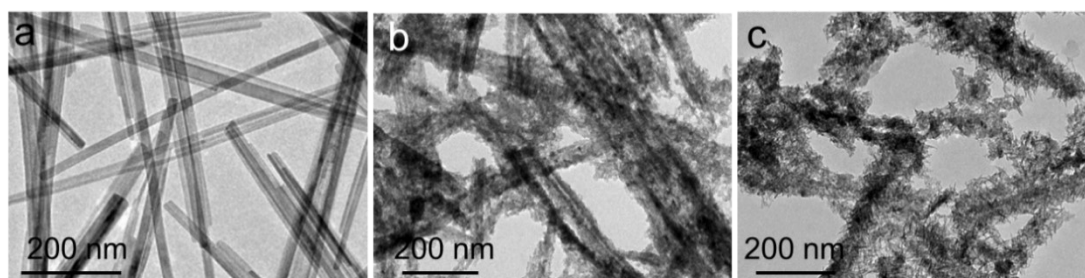

**Fig. S3.** (a) TEM images of porous  $\text{Cu}(\text{OH})_2$  nanorods with scale bar of 200 nm. (b) TEM images of  $\text{CuO}/\text{Cu}_2\text{O}/\text{SnO}_2$  nanorods with scale bar of 200 nm. (c) TEM images of B- $\text{CuO}/\text{Cu}_2\text{O}/\text{SnO}_2$  nanowires with scale bar of 200 nm.

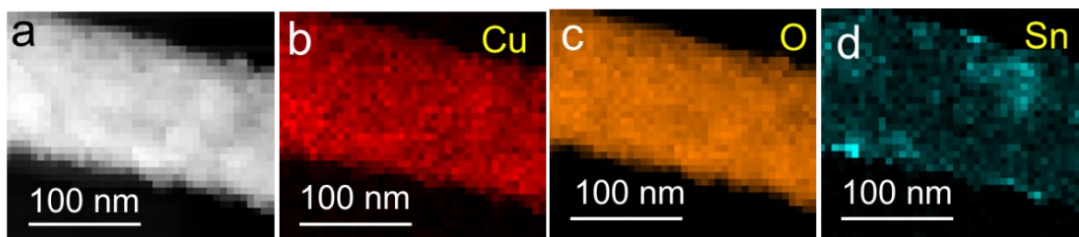

**Fig. S4.** The Mapping images of the CuO/Cu<sub>2</sub>O/SnO<sub>2</sub> nanorod with scale bar of 100 nm.

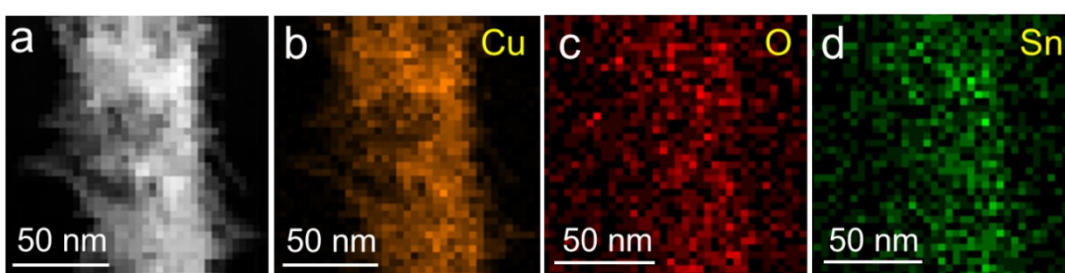

**Fig. S5.** The Mapping images of the B-CuO/Cu<sub>2</sub>O/SnO<sub>2</sub> nanowire with scale bar of 50 nm.

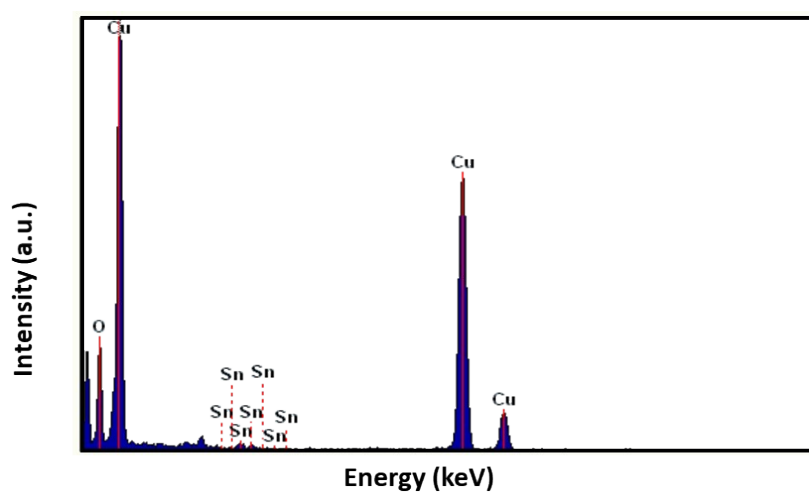

**Fig. S6.** The EDX pattern of the B-CuO/Cu<sub>2</sub>O/SnO<sub>2</sub> nanowires.

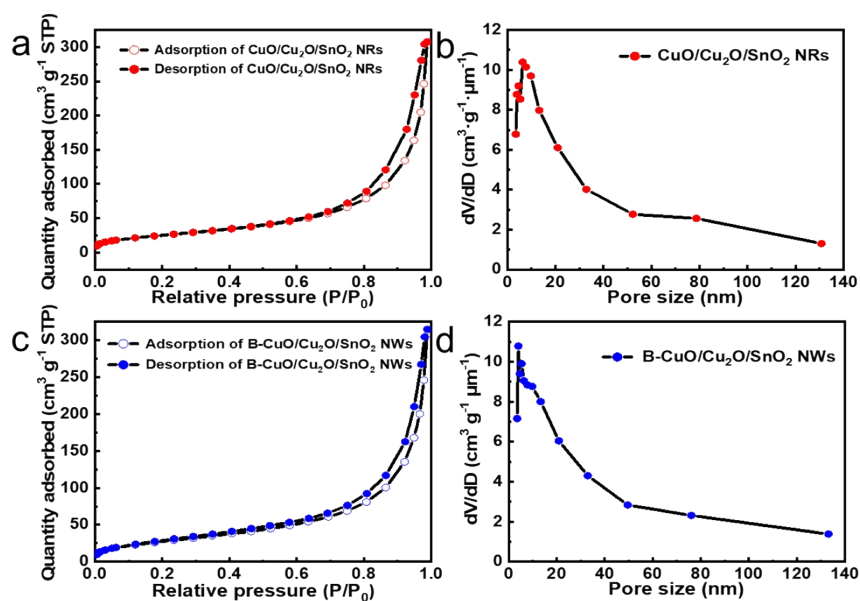

**Fig. S7.** (a) Nitrogen adsorption—desorption isotherm and (b) corresponding pore size distribution curves of CuO/Cu<sub>2</sub>O nanorods and CuO/Cu<sub>2</sub>O/SnO<sub>2</sub> nanorods. (c) Nitrogen adsorption—desorption isotherm and (d) corresponding pore size distribution curves of B-CuO/Cu<sub>2</sub>O/SnO<sub>2</sub> nanowires.

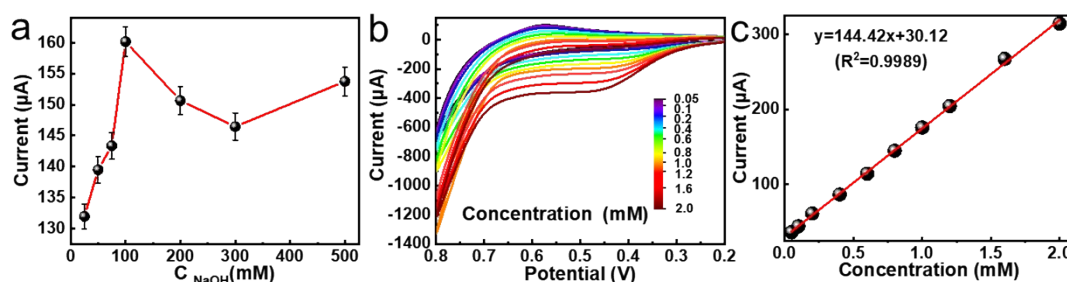

**Fig. S8.** (a) The effect of NaOH concentration on the peak current response of CuO/Cu<sub>2</sub>O/SnO<sub>2</sub> nanorods electrodes containing 1 mM glucose (scan rate:  $100 \text{mV s}^{-1}$ ). (b) CV curves of the CuO/Cu<sub>2</sub>O/SnO<sub>2</sub> nanorods electrode in the 100 mM NaOH electrolyte with a concentration of glucose ranging from 0.05 to 2 mM at a scan rate of  $100 \text{mV s}^{-1}$ . (c) The linear calibration plot between the oxidation peak current and glucose concentration.

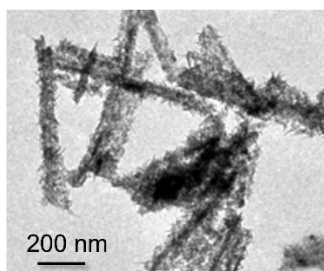

**Fig. S9.** The TEM images of B-CuO/Cu<sub>2</sub>O/SnO<sub>2</sub> nanowires after 4 weeks.

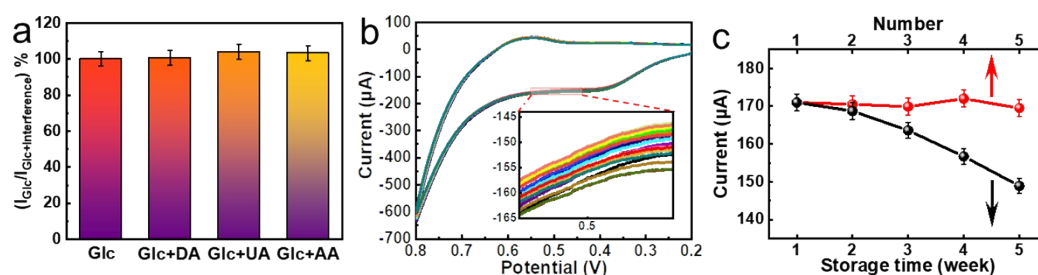

**Fig. S10.** (a) Selectivity study of the CuO/Cu<sub>2</sub>O/SnO<sub>2</sub> nanorods modified electrodes in the determination of 0.1 mM glucose (with 0.15 mM DA, 0.15 mM UA, 0.15mM AA). (b) 20 cycles of CV curves of the CuO/Cu<sub>2</sub>O/SnO<sub>2</sub> nanorods electrode. (c) Red and black point plots corresponding to 5 uniform CuO/Cu<sub>2</sub>O/SnO<sub>2</sub> nanorods electrodes and the same CuO/Cu<sub>2</sub>O/SnO<sub>2</sub> electrode measured over 4 weeks, respectively.

**Table S1.** The comparison of BET data for each sample.

| Materials              | CuO/Cu <sub>2</sub> O/SnO <sub>2</sub> NRs | B-CuO/Cu <sub>2</sub> O/SnO <sub>2</sub> NWs |
|------------------------|--------------------------------------------|----------------------------------------------|
| specific surface area  | 92.83 m <sup>2</sup> g <sup>-1</sup>       | 102.92 m <sup>2</sup> g <sup>-1</sup>        |
| pore size distribution | 5-15 nm                                    | 5-10 nm                                      |
